## Positive feedback loop of IL-1 $\beta$ /Akt/RAR $\alpha$ /Akt signaling mediates oncogenic property of RAR $\alpha$ in gastric carcinoma

Hong-Yue Ren<sup>1,\*</sup>, Fan Liu<sup>2,\*</sup>, Gui-Li Huang<sup>3</sup>, Yu Liu<sup>4</sup>, Jin-Xing Shen<sup>4</sup>, Pan Zhou<sup>3</sup>, Wen-Ming Liu<sup>5</sup>, Dong-Yan Shen<sup>4</sup>

<sup>1</sup>Department of Pathology, The Affiliated Southeast Hospital of Xiamen University, Zhangzhou 363000, Fujian Province, China

<sup>2</sup>Department of Medical College, Xiamen University, Xiamen 361005, Fujian Province, China

<sup>3</sup>State Key Laboratory of Cellular Stress Biology, Key Laboratory of the Ministry of Education for Coastal and Wetland Ecosystems, Department of Life Sciences, Xiamen University, Xiamen 361005, Fujian Province, China

<sup>4</sup>Department of Biobank, The First Affiliated Hospital of Xiamen University, Xiamen 361003, Fujian Province, China

<sup>5</sup>Department of Gastroenterology, Zhongshan Hospital, Gastroenterology Institute of Xiamen University, Gastroenterology Center of Xiamen, Xiamen 361003, Fujian Province, China

\*These authors have contributed equally to this work

**Correspondence to:** Dong-Yan Shen, **email:** shendongyan@163.com  
Wen-Ming Liu, **email:** 846928419@qq.com

**Keywords:** RAR $\alpha$ , gastric carcinoma, Akt, IL-1 $\beta$

**Received:** July 02, 2016

**Accepted:** December 01, 2016

**Published:** December 27, 2016

### ABSTRACT

**Abnormal expression and function of retinoic acid receptor  $\alpha$  (RAR $\alpha$ ) have been reported to be associated with various cancers including acute promyelocytic leukemia and hepatocellular carcinoma. However, the role and the mechanism of RAR $\alpha$  in gastric carcinoma (GC) were unknown. Here, the expression of RAR $\alpha$  was frequently elevated in human GC tissues and cell lines, and its overexpression was closely correlated with tumor size, lymph node metastasis and clinical stages in GC patients. Moreover, RAR $\alpha$  overexpression was related with pathological differentiation. Functionally, RAR $\alpha$  knockdown inhibited the proliferation and metastasis of GC cells, as well as enhanced drug susceptibility both *in vitro* and *in vivo*. Additionally, RAR $\alpha$  knockdown suppressed GC progression through regulating the expression of cell proliferation, cell cycle, invasion and drug resistance associated proteins, such as PCNA, CyclinB1, CyclinD2, CyclinE, p21, MMP9 and MDR1. Mechanistically, the above oncogenic properties of RAR $\alpha$  in GC were closely associated with Akt signaling activation. Moreover, overexpression of RAR $\alpha$  was induced by IL-1 $\beta$ /Akt signaling activation, which suggested a positive feedback loop of IL-1 $\beta$ /Akt/RAR $\alpha$ /Akt signaling in GC. Taken together, we demonstrated that RAR $\alpha$  was frequently elevated in GC and exerted oncogenic properties. It might be a potential molecular target for GC treatment.**

### INTRODUCTION

Gastric carcinoma (GC) is ranked as the second most common cancer and is the leading cause of cancer-related deaths in the world [1]. Current available therapeutic methods for GC, such as surgical excision, chemotherapy and chemoembolization, are less optimal especially in late stage of patients [2]. Therefore, it is urgent to understand the molecular mechanisms underlying GC progression so as to develop novel molecular targets for more effective therapies.

Retinoids including vitamin A and retinoic acid derivatives have profound effect on embryogenesis, differentiation, and carcinogenesis [3, 4]. These biological activities of retinoids are mediated by retinoic acid receptors (RARs) and retinoid X receptors (RXRs) two classes of specific nuclear retinoid receptors in the steroid/thyroid hormone family. RAR consist of three distinct receptor subtypes:  $\alpha$ ,  $\beta$ , and  $\gamma$  [5, 6]. Among them, increasing lines of evidence have implied that aberrant expression of RAR $\alpha$  may play critical roles in carcinogenesis. For example, in acute promyelocytic leukemia patients, the RAR $\alpha$  gene is fused

with a number of alternative partner genes such as PML, promyelocytic leukemia zinc finger [7] and nucleophosmin [8]. RAR $\alpha$  has been identified as highly expressed in hepatocellular carcinoma (HCC), and is possibly responsible for abnormal growth of HCC [9]. However, the role and mechanism of RAR $\alpha$  in GC remain unknown.

It is widely recognized that infection with *Helicobacter pylori* plays a crucial role in the initiation and progression of GC [10]. In recent years, the significance of chronic inflammation in carcinogenesis has gained more and more attention [11]. Such inflammatory response seems to be regulated by many proinflammatory cytokines, that can have autocrine, paracrine and endocrine effects. Interleukin-1 $\beta$  (IL-1 $\beta$ ) is a member of proinflammatory cytokine family which are produced by both tumor cells and stromal cells [12]. It has been reported to govern the proliferation and invasion related proteins of GC [13, 14]. Nevertheless, whether IL-1 $\beta$  regulates RAR $\alpha$  expression in development and progression of GC is unclear.

Cytokine and other growth factors such as insulin, epidermal growth factor and vascular endothelial growth factor can trigger the activation of signaling pathway including phosphatidylinositol 3-kinase (PI3K)/Akt through binding to their cell surface receptors. Moreover, PI3K/Akt signaling pathway regulates a variety of cellular activities, in particular, previous reports have indicated it has participated in tumorigenesis and tumor progression by promoting cell proliferation [15, 16]. In GC, phosphorylated Akt (p-Akt) expression may not only be useful for predicting the prognosis and efficacy of fluorouracil treatment [17], and also reflect the grade of malignancy in human gastric adenocarcinomas [18]. PI3K/Akt signaling is required for the attachment and spreading and growth *in vivo* of metastatic scirrhous GC as well [19]. However, whether the regulation of PI3K/Akt signaling links RAR $\alpha$  and GC remains undefined.

In the present study, we found that the expression of RAR $\alpha$  was highly expressed in both GC patients and cell lines. Moreover, RAR $\alpha$  level is significantly related with the progression of GC. Knockdown of RAR $\alpha$  could suppress PI3K/Akt signaling, leading to inhibition metastatic abilities and increasing drug susceptibility of GC cells. Furthermore, the proinflammation cytokine IL-1 $\beta$  could induce overexpression of RAR $\alpha$  through activation of PI3K/Akt signaling. Thus, we identify a positive feedback loop of IL-1 $\beta$ /Akt/RAR $\alpha$ /Akt signaling, suggesting an oncogenic potential of RAR $\alpha$  involved in the development of GC.

## RESULTS

### Overexpression of RAR $\alpha$ and its prognostic values in GC patients

Q-PCR and Western blot were performed to detect the expression of RAR $\alpha$  in tumor (T) and paired paracarcinoma (P) tissues of 21 GC patients. The results

revealed that the mRNA and protein levels of RAR $\alpha$  were significantly elevated in T tissues compared with that in P tissues (Figure 1A-1B). More samples from a cohort of 180 GC patients in tissue microarray were subjected to evaluate the expression and clinical significance of RAR $\alpha$  in GC. The IHC results showed that RAR $\alpha$  protein was strongly expressed in T tissues, presented dominantly in cytoplasm of tumor cells, but was weakly or not stained in P tissues (Figure 1C). In order to investigate the level of RAR $\alpha$  in these two tissues, the staining intensity of RAR $\alpha$  was divided into low (- to +) or high (++ to +++) groups (Figure 1D). As shown in Table 1, the high expression rate of RAR $\alpha$  in T tissues was 58%, which was much higher compared with the 6.25% in P tissues.

Clinicopathological analysis revealed that overexpression of RAR $\alpha$  was strongly correlated with tumor diameter, lymph node metastasis and clinical stages in GC patients (Table 2). Meanwhile RAR $\alpha$  overexpression was related with pathological differentiation. Furthermore, Kaplan-Meier analysis showed that GC patients with high RAR $\alpha$  expression had shorter median survival time (22 months) than that of low RAR $\alpha$  expression patients (32 months), but there was no statistical significance between the two groups ( $P > 0.05$ ) (Figure 1E). Taken together, these results indicated that abnormal overexpression of RAR $\alpha$  might be associated with the development of GC.

### Construction of RAR $\alpha$ knockdown cell model in GC cell lines

To further determine the aberrant expression pattern of RAR $\alpha$  in GC, three GC cell lines (BGC-823, SGC-7901, and MGC-803) and a normal human gastric epithelial cell line GES-1 were subjected to detect the level of RAR $\alpha$ . As shown in Figure 2A-2B, the mRNA and protein levels of RAR $\alpha$  in three GC cell lines were markedly higher than those of GES-1 cell lines. Moreover, overexpression of RAR $\alpha$  was primarily localized in the cytoplasm of GC cells, that was consistent with the IHC results from clinical GC tissues (Figure 2C). In order to characterize the functional role of RAR $\alpha$  in the development of GC, RAR $\alpha$  was downregulated by stably transducing with shRAR $\alpha$ -expressing lentiviruses. As shown in Figure 2D-2F, the mRNA and protein levels of RAR $\alpha$  in shRAR $\alpha$ -BGC-823 or SGC-7901 cells were much lower than those in their respective control cells, indicating that RAR $\alpha$  was effectively knockdown.

### Inhibitory effects of RAR $\alpha$ knockdown on proliferation of GC cells

To characterize the biological effect of RAR $\alpha$  knockdown on the proliferation of GC cells *in vitro*, MTT and colony formation assay were performed. Compared with the control cells (Figure 3A), the proliferation of both shRAR $\alpha$ -BGC-823 and shRAR $\alpha$ -SGC-7901 cells were significantly reduced from day 3. Moreover, colonies of

shRAR $\alpha$ -BGC-823 and shRAR $\alpha$ -SGC-7901 cells were fewer and relatively smaller in size, compared with their relative shCtrl cells (Figure 3B).

The tumorigenic potential of RAR $\alpha$  was also evaluated by xenograft tumor in nude mice. As shown in Figure 3C, the growth of shRAR $\alpha$ -BGC-823 xenografts were slower from day 6 compared with that of shCtrl group. The average tumor weight of shRAR $\alpha$ -BGC-823

xenografts was  $0.59 \pm 0.05$  g, which was significantly lower than that of shCtrl group ( $0.98 \pm 0.08$  g). In addition, significant reduction of proliferation marker PCNA was observed in shRAR $\alpha$ -BGC-823 xenografts (Figure 3D). Taken together, these results suggested that RAR $\alpha$  might be critical for oncogenic property of GC cells.

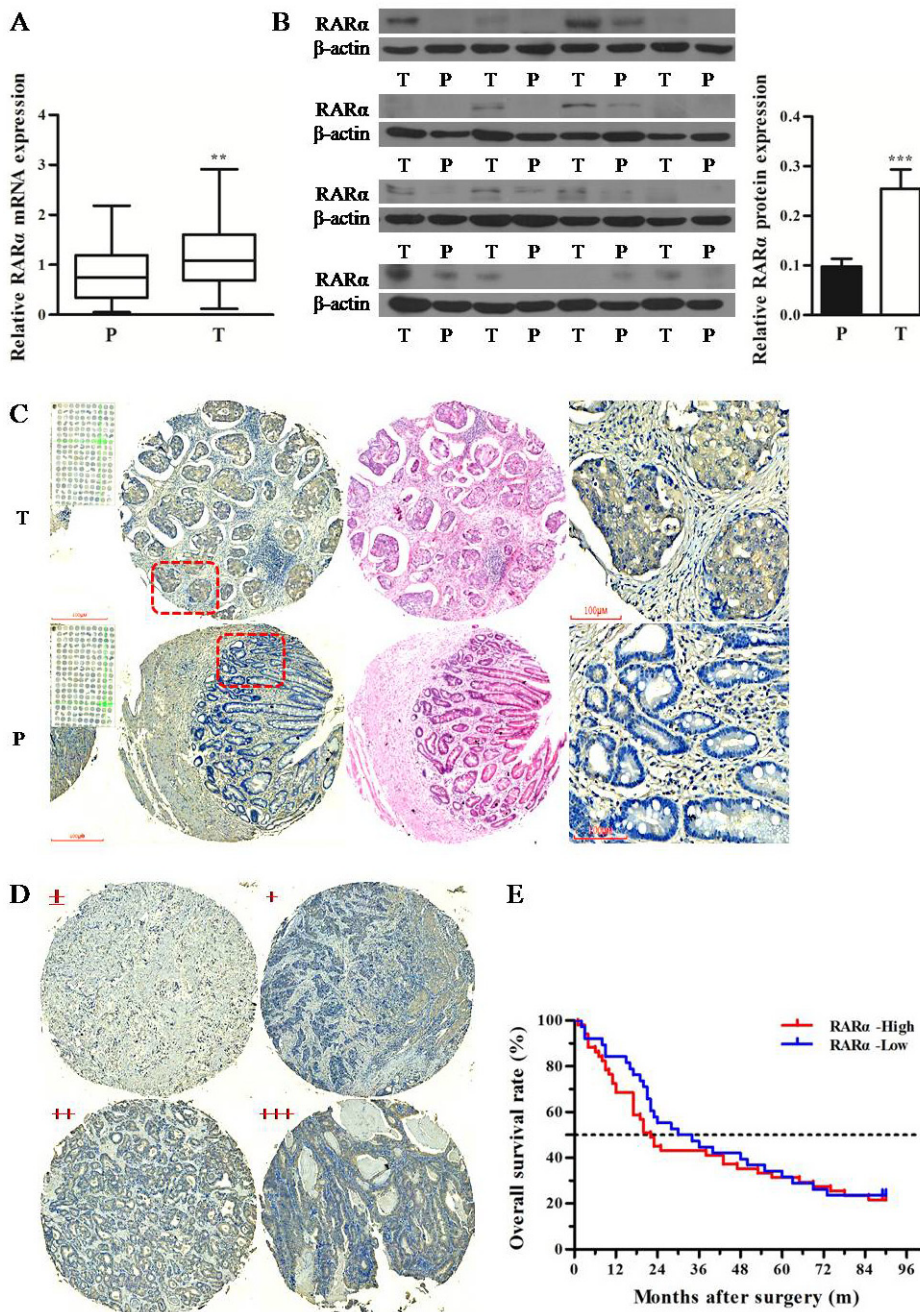

**Figure 1: Expression and clinical significance of RAR $\alpha$  in GC tissues.** A. Expression of RAR $\alpha$  mRNA in T and P tissues was assessed by Q-PCR. The data were normalized to GAPDH. The error bars presented as mean  $\pm$  SEM. B. Expression of RAR $\alpha$  protein in T and P tissues was assessed by Western blot.  $\beta$ -actin served as loading control. C. IHC analysis of RAR $\alpha$  protein in GC tissue microarray. Zoom: 100 $\times$ , 400 $\times$ . D. Four grades of RAR $\alpha$  staining intensity. E. Kaplan-Meier survival analysis of RAR $\alpha$  expression in GC patients. T, tumor; P, paracarcinoma tissues; \*\*  $P < 0.01$ , \*\*\*  $P < 0.001$ .

**Table 1: Distribution of RAR $\alpha$  classifications in GC and paracarcinoma tissues**

| Tissue type   | n   | RAR $\alpha$ stain grades |    |    |     | $X^2$ | P        |
|---------------|-----|---------------------------|----|----|-----|-------|----------|
|               |     | -                         | +  | ++ | +++ |       |          |
| Tumor         | 100 | 29                        | 13 | 29 | 29  | 56.25 | < 0.0001 |
| Paracarcinoma | 80  | 40                        | 35 | 5  | 0   |       |          |

**Table 2: Relationships between RAR $\alpha$  and clinical features in GC**

| Features                     | n  | RAR $\alpha$ |      | $X^2$  | P       |
|------------------------------|----|--------------|------|--------|---------|
|                              |    | Low          | High |        |         |
| Age                          |    |              |      | 1.301  | 0.254   |
| < 60                         | 33 | 16           | 17   |        |         |
| $\geq$ 60                    | 67 | 26           | 41   |        |         |
| Sex                          |    |              |      | 0.016  | 0.8986  |
| female                       | 35 | 15           | 20   |        |         |
| male                         | 65 | 27           | 38   |        |         |
| Pathological differentiation |    |              |      | 16.980 | 0.0007* |
| II                           | 15 | 8            | 7    |        |         |
| II-III                       | 22 | 4            | 18   |        |         |
| III                          | 52 | 20           | 32   |        |         |
| III-IV                       | 11 | 10           | 1    |        |         |
| Tumor diameter               |    |              |      | 9.514  | 0.0086* |
| d $\leq$ 4                   | 29 | 19           | 10   |        |         |
| 4 < d < 10                   | 58 | 18           | 40   |        |         |
| d $\geq$ 10                  | 13 | 5            | 8    |        |         |
| T classification             |    |              |      | 6.004  | 0.1114  |
| T1                           | 9  | 7            | 2    |        |         |
| T2                           | 11 | 5            | 6    |        |         |
| T3                           | 66 | 26           | 40   |        |         |
| T4                           | 14 | 4            | 10   |        |         |
| N classification             |    |              |      | 9.549  | 0.0228* |
| N0                           | 27 | 18           | 9    |        |         |
| N1                           | 16 | 5            | 11   |        |         |
| N2                           | 27 | 10           | 17   |        |         |
| N3                           | 30 | 9            | 21   |        |         |
| M classification             |    |              |      | 0.305  | 0.5808  |
| M0                           | 91 | 39           | 52   |        |         |
| M1                           | 9  | 3            | 6    |        |         |
| Clinical stages              |    |              |      | 13.87  | 0.0031* |
| 1                            | 12 | 9            | 3    |        |         |
| 2                            | 32 | 18           | 14   |        |         |
| 3                            | 49 | 14           | 35   |        |         |
| 4                            | 7  | 1            | 6    |        |         |

\* A P value of less than 0.05 was considered statistically significant.



## RAR $\alpha$ functions in cellular motility, invasion and drug susceptibility

Metastasis is not only a sign of deterioration but also a major cause of treatment failure in GC patients. Hence transwell assays were performed to detect the effect of RAR $\alpha$  knockdown on the capacity of migration and invasion in BGC-823 cell line. Transwell assays results showed a significant reduction in migration of shRAR $\alpha$  cells compared to that of shCtrl cells in BGC-823 cell line. To further explore the role of RAR $\alpha$  in cell invasion, transwell assays with matrigel precoated in the chamber were performed and demonstrated that the invasive

capacity of BGC-823 cells was markedly reduced after RAR $\alpha$  knockdown (Figure 4A).

Multidrug resistance is frequently induced during chemotherapy. The effect of RAR $\alpha$  knockdown on the drug susceptibility of GC cells was investigated *in vitro* and *in vivo*. As shown in Figure 4B, MTT assays revealed a significant enhancement in several chemotherapeutics susceptibility of shRAR $\alpha$  cells compared to shCtrl cells in both BGC-823 and SGC-7901 cells. Furthermore, the growth inhibition rate of 5-FU on RAR $\alpha$  knockdown xenograft tumors ( $71.8 \pm 5.3\%$ ) was much higher than that of control group ( $49.2 \pm 4.2\%$ ) (Figure 4C). These above data indicated that RAR $\alpha$  knockdown could inhibit

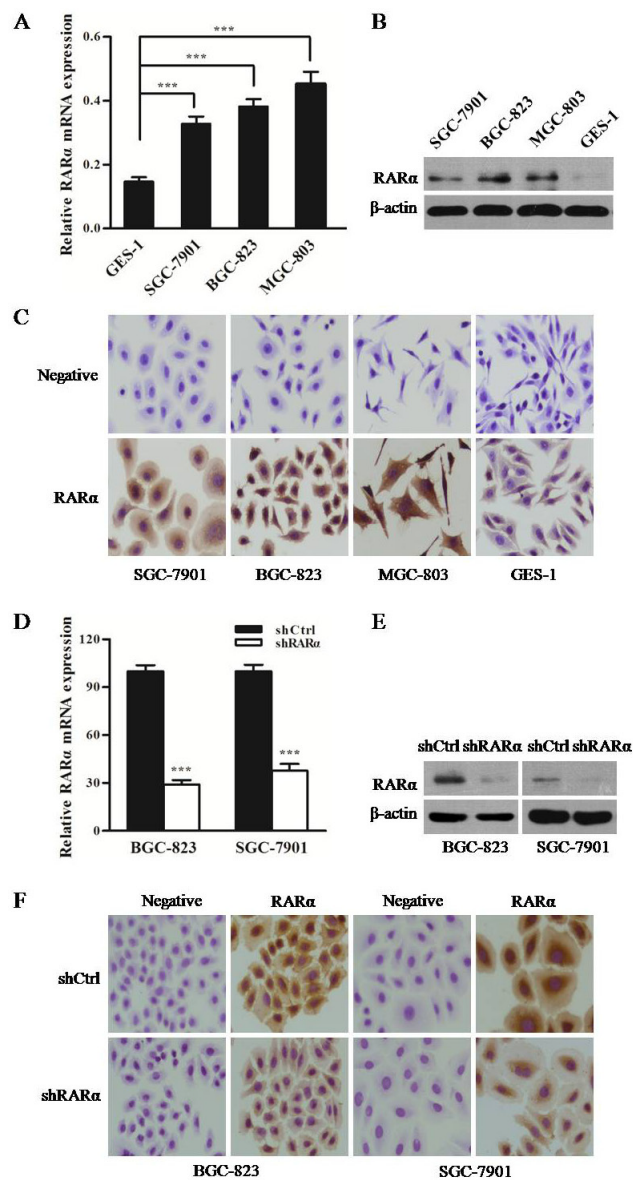

**Figure 2: Expression of RAR $\alpha$  in GC cell lines and constructed cell models.** A. Expression of RAR $\alpha$  mRNA in GC cells was detected by Q-PCR. The data were normalized to GAPDH. The error bars presented as mean  $\pm$  SEM. B. Expression of RAR $\alpha$  protein in GC cells was detected by Western blot. C. ICC analysis of RAR $\alpha$  in GC cells. Zoom: 200 $\times$ . D-F. Construction of RAR $\alpha$  knockdown cell model in SGC-823 and SGC-7901 were identified by Q-PCR, Western blot and ICC. \*\*\*  $P < 0.001$ .

metastatic abilities and enhance drug susceptibility of GC cells.

### RAR $\alpha$ promotes cell proliferation, invasion and inhibits drug susceptibility via activation of PI3K/Akt signaling

Cell cycle disorder is closely related to the rapid proliferation of tumor cells. The flow cytometry data of cell cycle analysis showed that significant increase in the

proportion of cells in the G1 phase were detected in RAR $\alpha$  knockdown, and accordingly, the fractions of cells in the S phase decreased (Figure 5A and Supplementary Figure 1). Western blot analysis showed that after silencing of RAR $\alpha$ , the expression of PCNA, CyclinB1, CyclinD2, and CyclinE was decreased, whereas p21 expression was augmented compared to the control (Figure 5B). In addition, MMP9 and MDR1 have been recognized as critical invasion and drug resistance makers, respectively.

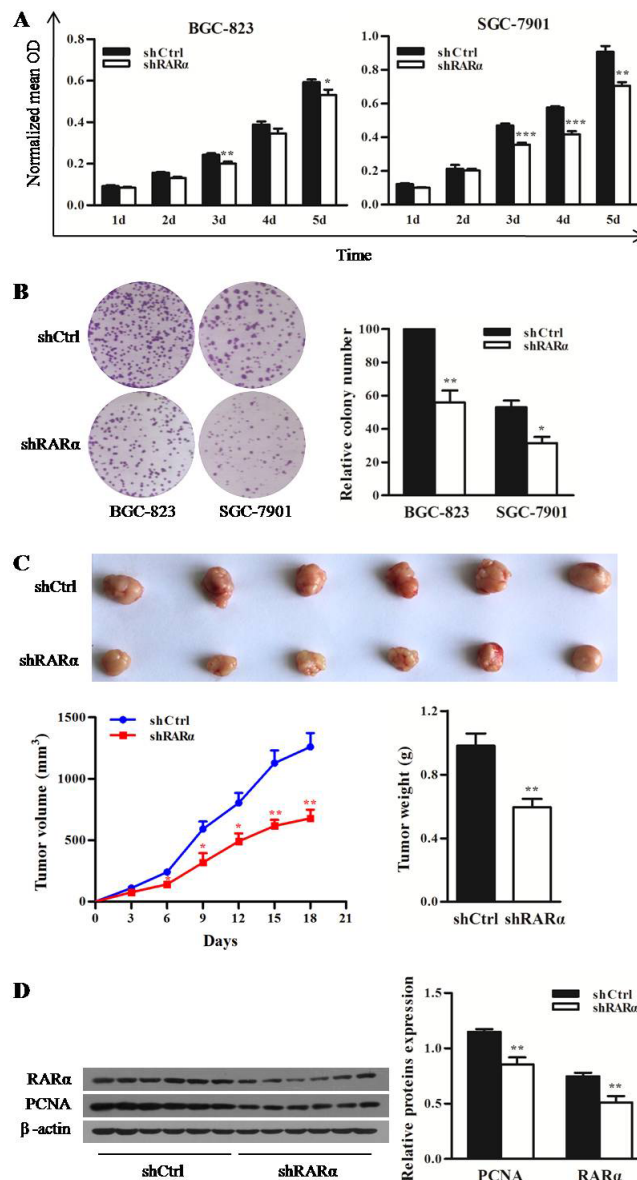

**Figure 3: Effect of RAR $\alpha$  knockdown on the proliferation of GC cells *in vitro* and *in vivo*.** **A.** MTT analysis for the proliferation of BGC-823 and SGC-7901 cells after RAR $\alpha$  knockdown. **B.** Control or RAR $\alpha$  knockdown of BGC-823 and SGC-7901 cells were subjected to anchorage-dependent clonogenic assay. Representative pictures for colony growth are shown (right). Quantification of the number of colonies was normalized with that of shCtrl-BGC-823 cells (left). **C.** shRAR $\alpha$ -BGC-823 cells and control cells were subcutaneously injected in nude mice to establish xenograft tumors. Representative tumors and their volume are depicted graphically; n = 6 (for each group). Error bar represents SEM. **D.** Western blot analysis for PCNA and RAR $\alpha$  in shCtrl and shRAR $\alpha$  xenograft tumors with  $\beta$ -actin as a loading control. \*  $P < 0.05$ , \*\*  $P < 0.01$ , \*\*\*  $P < 0.001$ .

As shown in Figure 5B, the expression levels of MMP9 and MDR1 were inhibited after downregulation of RAR $\alpha$ .

RAR $\alpha$  could interact with p85 $\alpha$  of PI3K subunits to activate PI3K/Akt signaling [20], which played an important role in the development of GC including regulation of cell cycle [21]. Consistent with previous studies, we found that knockdown of RAR $\alpha$  suppressed the phosphorylation level of Akt at serine 473 (S473) and threonine 308 (T308) (Figure 5B). In contrast, overexpression of RAR $\alpha$  strongly increased the level of p-Akt at S473 and T308 and this effect could be retarded by LY294002, the specific inhibitor for PI3K/Akt signaling

(Figure 5C). Meanwhile, LY294002 could reverse the effect of RAR $\alpha$  overexpression on the expression of PCNA, CyclinB1, CyclinD2, CyclinE, p21, MMP9 and MDR1 (Figure 5C), which indicated that RAR $\alpha$  might regulate the cell development and progression via activation of PI3K/Akt signaling.

### A positive feedback loop between RAR $\alpha$ and the Akt signaling

In order to investigate the molecular mechanisms underlying the RAR $\alpha$  aberrant expression in GC, we

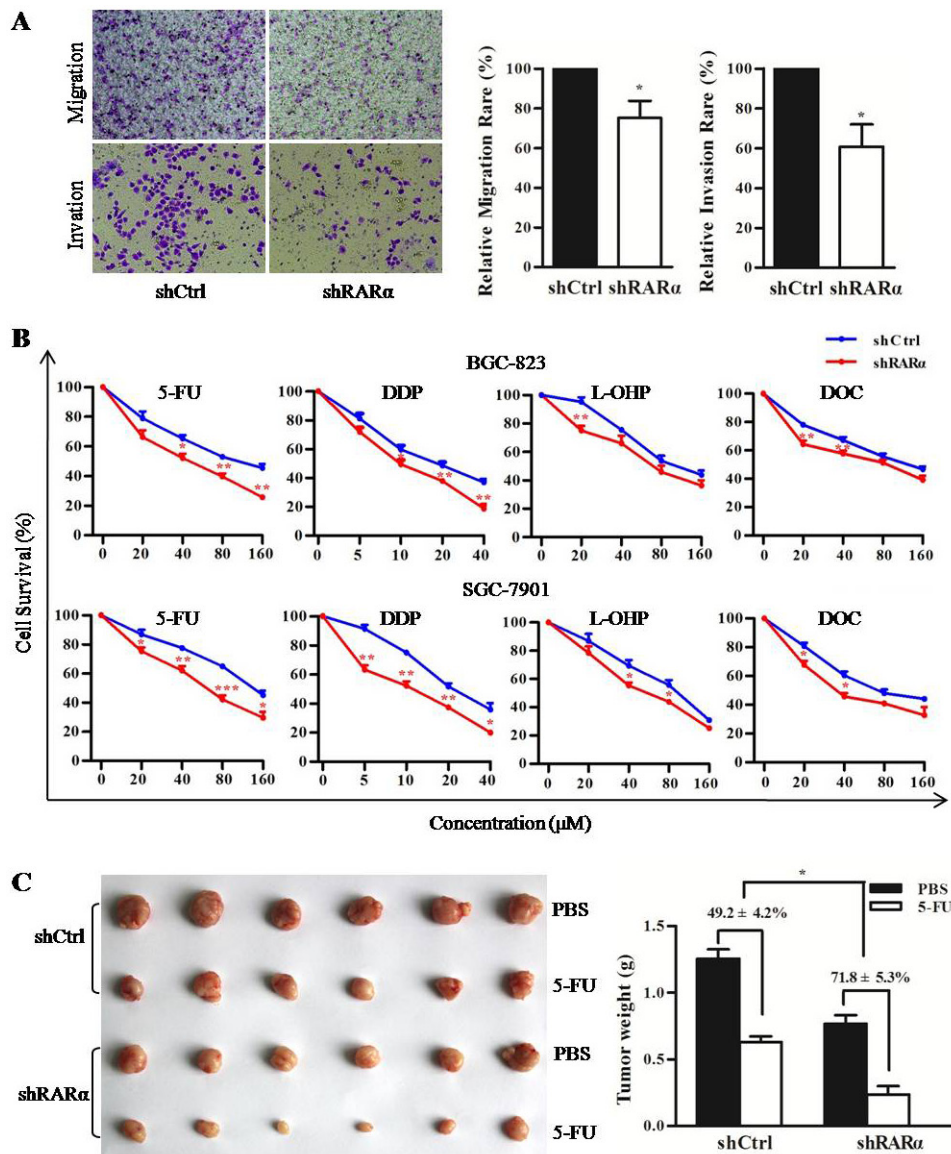

**Figure 4: Critical role of RAR $\alpha$  in cellular motility, invasion and drug susceptibility.** A. Control or RAR $\alpha$  knockdown of BGC-823 were subjected to transwell migration (without Matrigel) and invasion (with Matrigel) assays. Cells invading Matrigel were imaged in a bright-field microscope under 200 $\times$  magnification (right). Image software analysis for the results of three independent experiments (left). B. MTT assay performed in shCtrl or shRAR $\alpha$  of BGC-823 and SGC-7901 to detected the drug susceptibility to 5-FU, DDP, L-OHP and DOC. C. The drug susceptibility of shCtrl or shRAR $\alpha$  of BGC-823 xenograft tumor to 5-FU were shown (right) and analyzed (left), n = 6 (for each group). \*  $P < 0.05$ , \*\*  $P < 0.01$ , \*\*\*  $P < 0.001$ .

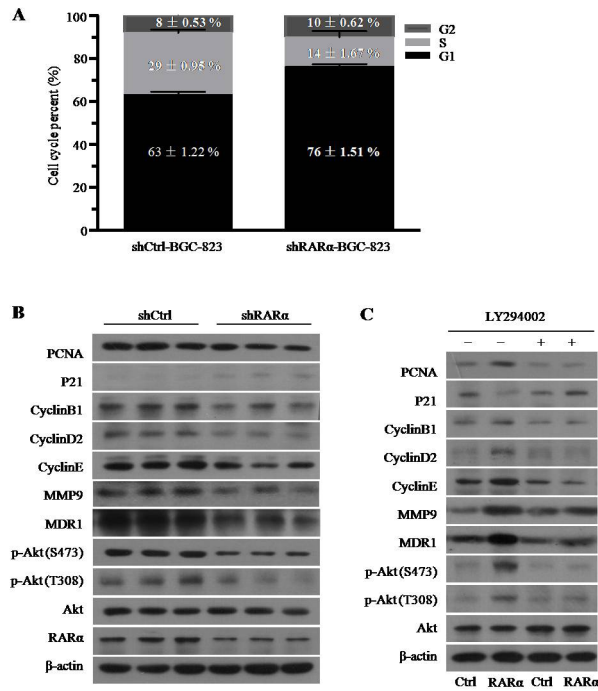

**Figure 5: The role and mechanism of RARα in the GC cell development and progression.** A. Cell cycle was analysed by flow cytometry after RARα knockdown. B. Western blot analysis of cell cycle, proliferation, invasion, drug resistance and Akt signaling associated proteins expression after RARα knockdown in BGC-823. C. Effect of LY294002 and (or) RARα overexpression on the expression of cell cycle, proliferation, invasion, drug resistance and Akt signaling associated proteins expression in BGC-823. LY294002, 1 μM.

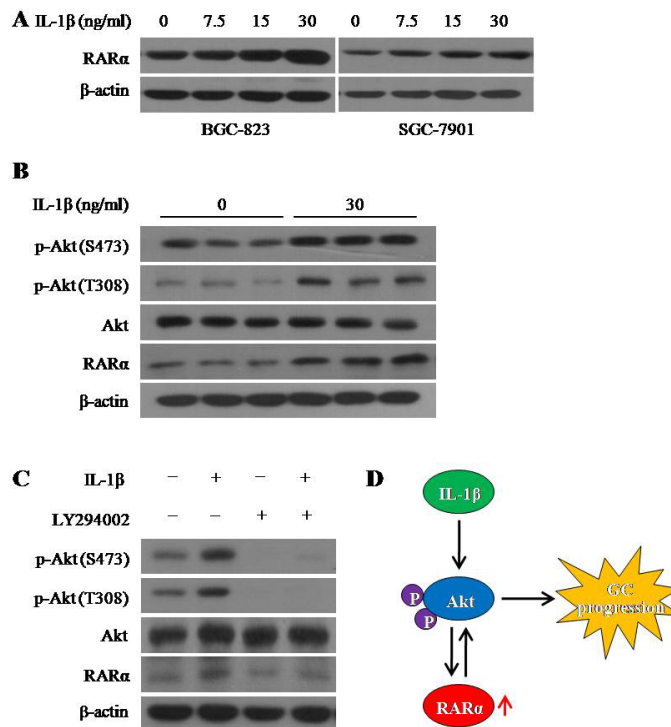

**Figure 6: IL-1β induced RARα overexpression via activation Akt signaling.** A. Western blot analysis for RARα expression after treatment with different concentration of IL-1β for 24 hour. B. Western blot analysis for RARα expression and the activation of Akt signaling after treatment with IL-1β for 24 hour in BGC-823. C. After treatment with IL-1β and (or) LY294002 for 24 hour, expression of RARα, p-Akt and Akt were detected by Western blot in BGC-823. IL-1β, 30 ng/ml; LY294002, 1 μM. D. Schematic diagram for the positive feedback loop of IL-1β/Akt/RARα/Akt signaling.



hypothesized that the infiltration of inflammatory factors, an important feature of the tumor microenvironment, lead to the overexpression of RAR $\alpha$ . During screening experiments, we found that IL-1 $\beta$ , an important proinflammatory cytokine, increased the level of RAR $\alpha$  protein in a dose-dependent manner in both BGC-823 and SGC-7901 cells (Figure 6A), whereas TNF $\alpha$  and IL-6 failed to alter RAR $\alpha$  expression significantly in GC cells (Supplementary Figure 2). Furthermore, IL-1 $\beta$  activated the PI3K/Akt signaling via enhancing the phosphorylation of Akt at S473 and T308 (Figure 6B). Meanwhile, overexpression of RAR $\alpha$  induced by IL-1 $\beta$  could be reversed by the PI3K/Akt inhibitor LY294002 (Figure 6C), indicating that Akt signaling is essential for IL-1 $\beta$ -upregulated RAR $\alpha$ . Hence, these data suggested the existence of a positive feedback loop of IL-1 $\beta$ /Akt/RAR $\alpha$ /Akt signaling in the development of GC (Figure 6D).

## DISCUSSION

Multiple lines of evidence presented here identified an aberrant expression of RAR $\alpha$  in providing oncogenic cues that promote GC tumorigenesis. We not only validated the frequent upregulation of RAR $\alpha$  in clinical GC specimens and its clinical significance, and also demonstrated the oncogenic property of RAR $\alpha$  in proliferation, metastasis and drug susceptibility of GC cells through Akt signaling. Our results suggested that targeting RAR $\alpha$  might be a potentially beneficial for treatment of GC.

RAR $\alpha$  has been characterized as an oncogene in the development of various tumors. Its overexpression disrupted normal acinar structure and induced epithelial to mesenchymal transition during mammary tumorigenesis [22]. RAR $\alpha$  is also required for efficient estrogen receptor  $\alpha$  mediated transcription and cell proliferation in breast cancer [23]. Our current study showed that, downregulation of RAR $\alpha$  inhibited GC growth and increased drug susceptibility both *in vitro* and *in vivo*, as well as decreased metastasis *in vitro*. RAR $\alpha$  knockdown resulted in cell cycle arrest at G1 phase accompanying with the reduction of S phase. In addition, silencing RAR $\alpha$  inhibited the expression of PCNA, CyclinB1, CyclinD2, CyclinE, MMP9 and MDR1 and enhanced p21 expression, that may play critical roles in tumor growth, invasion, drug resistance. All results came to a conclusion that RAR $\alpha$  regulate the development and progression of GC in a form of oncogene.

Molecular studies provided evidences that, RARs including RAR $\alpha$  could interact with p85 $\alpha$  in various cell types thus activate the PI3K/Akt signaling pathway [24, 25]. PI3Ks can be divided into three classes according to structure and function, termed as class I, II and III. Class IA PI3Ks consists of regulatory and catalytic subunits. P85 $\alpha$ , a regulatory subunit of class IA PI3Ks, appears to be a phosphoprotein substrate of many cytoplasmic and receptor tyrosine kinases [26]. We further evaluated the biological significance of the regulation between

RAR $\alpha$  and PI3K/Akt signaling in the growth of GC cells. Our data showed that the phosphorylation of Akt was suppressed by downregulation of RAR $\alpha$ , and enhanced by upregulation of RAR $\alpha$ . Moreover, RAR $\alpha$  overexpression increased the level of PCNA, CyclinB1, CyclinD2, CyclinE MMP9 and MDR1 as well as decreased p21 expression. And this could be reversed by LY294002, the specific inhibitor for PI3K/Akt signaling, suggesting that RAR $\alpha$  might regulate PI3K/Akt signaling to promote the progression of GC.

In the present study, we showed that RAR $\alpha$  localized majorly in the cytoplasm of clinical samples and cell lines, which was consistent with RAR $\gamma$ . Previous studies have shown that overexpressed RAR $\gamma$  could translocate to the cytoplasm in HCC and cholangiocarcinoma [27, 28]. Altered subcellular localization of RAR $\gamma$  was associated with its oncogenic effects. In addition, RAR $\gamma$  could interact with p85 $\alpha$  and  $\beta$ -catenin, that may retain RAR $\gamma$  in the cytoplasm [27, 28].

The cause and mechanism of abnormal RAR $\alpha$  overexpression in malignant tumors have not yet been studied. Inflammation of stomach mucosa has been regarded as a key cause of gastric carcinogenesis, and the presence of proinflammatory cytokines can regulate specific genes participated in the process of GC. IL-1 $\beta$ , serving as a known proinflammatory cytokine, can activate MUC2 gene involved in the gastric neoplastic transformation [29]. Some studies indicated that IL-1 $\beta$  can trigger the activation of both Akt pathway and NF- $\kappa$ B pathway, which appears to be important molecular links between inflammation and tumor [30, 31]. In the present study, we found that IL-1 $\beta$  and not TNF $\alpha$  or IL-6 exerted potent effects on the expression of RAR $\alpha$ . IL-1 $\beta$  could enhance RAR $\alpha$  overexpression in a dose-dependent manner. In addition, after co-incubation with IL-1 $\beta$ , the phosphorylation of Akt was enhanced. LY294002 inhibited the upregulation of RAR $\alpha$  induced by IL-1 $\beta$ , suggesting that IL-1 $\beta$  upregulated RAR $\alpha$  via Akt signaling. It is likely that overexpression of RAR $\alpha$  promoted GC progression via Akt signaling and this further formed a positive feedback of IL-1 $\beta$ /Akt/RAR $\alpha$ /Akt signaling.

In conclusion, our study identified RAR $\alpha$  as a potential oncogene in the progression of GC. Overexpression of RAR $\alpha$  might promote the progression of GC cells through forming the positive feedback of IL-1 $\beta$ /Akt/RAR $\alpha$ /Akt signaling. Therefore, our findings are potentially beneficial for the future development of promising target against malignant progression of GC.

## MATERIALS AND METHODS

### Reagents

1640 medium, DMEM medium, fetal bovine serum (FBS), penicillin and Lipofectamine 2000 were purchased from Invitrogen (Carlsbad, CA, USA). IL-1 $\beta$  was from R&D Systems. LY294002, propidium iodide (PI), thymidine, 5-fluorouracil (5-FU),

diaminodichloroplatinum (DDP), oxaliplatin (L-OHP) and docetaxel (DOC) were from Sigma-Aldrich (Indianapolis, IN, USA). Antibodies against RAR $\alpha$  (sc-551), PCNA (sc-25289), CyclinB1 (sc-752), CyclinD2 (sc-181), CyclinE (sc-481) and MMP9 (sc-21733) were from Santa Cruz Biotechnology (Santa Cruz, CA, USA). Antibodies against  $\beta$ -actin (12262), p-Akt (Ser473, 12694), p-Akt (Thr308, 13038), Akt (4685) and MDR1 (12683) were from Cell Signaling Technologies (Danvers, Ma, USA). The EliVision Plus kit and Quantitative PCR kit were from Maixin Bio (Fuzhou, China) and Tiangen Bio (Beijing, China), respectively.

### Patients and tissue samples

Paired tumor (T) and paracarcinoma tissues (P) (> 5 cm distant from the edges of tumor; T = P, n = 21) specimens of GC patients, who had undergone a gastrectomy between 2013 and 2015, were collected at the First Affiliated Hospital of Xiamen University. Tissue microarray of human GC was purchased from National SOBC Biobank, which included 100 GC specimens, 80 samples of paired paracarcinoma tissues. The clinicopathological data are summarized in Table 2 including age, sex, pathological differentiation, tumor diameter, TNM classifications and Clinical stages. None of patients received preoperative treatment, such as radiation or chemotherapy. Written informed consent was obtained from each patient prior to sample collection. The study protocol was conducted in accordance with the ethical guidelines of the 1975 Declaration of Helsinki and was approved by the Institute Research Ethics Committee of the First Affiliated Hospital of Xiamen University.

### Cell culture and transfection

Human GC cell lines BGC-823, SGC-7901, and MGC-803 as well as normal human gastric epithelial cells GES-1 were supplied by Key Laboratory of the First Affiliated Hospital of Xiamen University. The cells cultured in RPMI 1640 medium containing 10% FBS, 100 U/ml penicillin at 37°C in an atmosphere of 5% CO<sub>2</sub> and humidified incubator. For establishment of RAR $\alpha$  knockdown cell lines, 293T cells were cotransfected with target plasmids and the packaging plasmids according to the manufacturer's instructions. Viral supernatants including infectious lentiviral particles were harvested after transfection day 2, and then added in BGC-823 and SGC-7901 culture. After infection, cells were selected in 500  $\mu$ g/ml G418 for 2 weeks.

### Immunohistochemistry (IHC) and immunocytochemistry (ICC)

IHC and ICC were performed as previously described [32]. Tissue microarray and slides of cells were reacted with primary antibody to RAR $\alpha$  (1:100) at 4°C for

overnight. Pre-immune sheep serum was used as negative control. All sections were independently and blindly examined by two experienced pathologists.

### Quantitative real-time reverse transcription PCR assay (Q-PCR)

The Q-PCR was performed on an ABI 7500 fast real-time PCR system (Applied Biosystems, Foster City, CA) as previously described [33]. The Q-PCR primers are as follows: RAR $\alpha$ , forward primer AATACACTACGAACAACAGC, reverse primer CGAACTCCACAGTCTTAATG; GAPDH, forward primer CACATGGCCTCCAAGGAGTAAG, reverse primer TGAGGGTCTCTCTCTTCTTCTTGT. Relative expression levels of RAR $\alpha$  were normalized against GAPDH.

### Western blot analysis

Cell lysates were separated by SDS-PAGE and transferred to a PVDF membrane as previously described [33]. After incubation with primary and secondary antibodies, the membranes were washed in PBST. Then signals were detected with an enhanced chemiluminescence system.

### Cell viability assay

Cell viability was assessed using MTT assay. The cell lines were seeded in 96 well plates and allowed to grow for 1, 2, 3, 4 and 5 days. For drug susceptibility assay, cells were treated with various concentrations of 5-FU, DDP, L-OHP and DOC for 48 hours. Then 20  $\mu$ l MTT (5mg/ml) was added to each well and incubated at 37°C for 4 hours. The medium was removed and formazan crystals were dissolved in DMSO. The optical density (OD) was measured at 490 nm using a microplate reader.

### Cell cycle analysis

The effect of RAR $\alpha$  knockdown on cell cycle progression was determined by flow cytometry. The thymidine-synchronized cells were collected after G1 block. Then the cells were digested and centrifuged at 800 rpm for 10 min. After fixation in 70% ethanol at 4°C overnight, the cells were stained with PI solution (50  $\mu$ g/ml PI and 100 $\mu$ g/ml RNase A in PBS) for detection.

### Colony formation assay

Cells were seeded at a density of 500 cells per well in six well plates and incubated for 14 days to form colonies. The cells were washed with PBS and stained with crystal violet. The number of colonies was counted using an inverse microscope. The experiments were carried out at least three times.

## Tumor xenografts

BGC-823 stably transfected with vectors downregulating RAR $\alpha$  or the control vectors were subcutaneously injected into the right outer of 6 weeks old male BALB/c athymic nude mice for 18 days. Tumor volumes and weights were measured as previously described [28]. For drug susceptibility experiment, 5-FU (20 mg/kg) was administered via intraperitoneally injection when tumor volumes were about 50 mm<sup>3</sup>. At the end of the 2 week dosing schedule, the mice were sacrificed with CO<sub>2</sub> inhalation. Ethical approval was obtained from the Animal Care and Use Committee of the First Affiliated Hospital of Xiamen University before the beginning of experiments.

## Cell migration and invasion assay

Cell migration and invasion assay were detected by transwell assays. Cells were seeded in the upper chambers in serum-free media with or without the Matrigel membrane for 48 hour. Then cells migrating through the membrane were counted after they were stained with crystal violet.

## Statistical analysis

SPSS16.0 statistical software package (SPSS Inc., Chicago, IL, USA) was used to analyse statistical data. Data were expressed as mean  $\pm$  SEM from at least three independent experiments. Statistics was evaluated using Student's t test or ANOVA analysis. IHC on tissue microarrays was analyzed by Pearson's  $\chi^2$  test, and the survival rate was calculated by the Kaplan-Meier method. The data were regarded as significant when the *P* value was less than 0.05.

## ACKNOWLEDGMENTS

This work was supported by the National Natural Science Foundation of China (Grant Nos. 81572394 and 81471970), Project of Natural Science Foundation of Science and Technology Department, Fujian, China (Grant No. 2015J01560), Project of Young and Middle-aged Backbone Talents Cultivation, Fujian, China (Grant No. 2015-ZQN-ZD31), the China Postdoctoral Science Foundation (Grant No. 2012M511785), the Fundamental Research Funds for the Central Universities (Grant No. 20720140545) and the Projects of Fujian Province for Young Scientists (Grant No. 2015-2-48).

## CONFLICTS OF INTEREST

The author(s) declare that they have no competing interests.

## REFERENCES

1. Gomceli I, Demiriz B, Tez M. Gastric carcinogenesis. *World J Gastroenterol.* 2012; 18: 5164-70.
2. Guggenheim DE, Shah MA. Gastric cancer epidemiology and risk factors. *J Surg Oncol.* 2013; 107: 230-6.
3. De Luca LM. Retinoids and their receptors in differentiation, embryogenesis, and neoplasia. *FASEB J.* 1991; 5: 2924-33.
4. Gronemeyer H, Gustafsson JA, Laudet V. Principles for modulation of the nuclear receptor superfamily. *Nat Rev Drug Discov.* 2004; 3: 950-64.
5. di Masi A, Leboffe L, De Marinis E, Pagano F, Cicconi L, Rochette-Egly C, Lo-Coco F, Ascenzi P, Nervi C. Retinoic acid receptors: from molecular mechanisms to cancer therapy. *Mol Aspects Med.* 2015; 41: 1-115.
6. Mangelsdorf DJ, Thummel C, Beato M, Herrlich P, Schutz G, Umesono K, Blumberg B, Kastner P, Mark M, Chambon P, Evans RM. The nuclear receptor superfamily: the second decade. *Cell.* 1995; 83: 835-9.
7. Chen SJ, Zelent A, Tong JH, Yu HQ, Wang ZY, Derre J, Berger R, Waxman S, Chen Z. Rearrangements of the retinoic acid receptor alpha and promyelocytic leukemia zinc finger genes resulting from t(11;17)(q23;q21) in a patient with acute promyelocytic leukemia. *J Clin Invest.* 1993; 91: 2260-7.
8. Redner RL, Rush EA, Faas S, Rudert WA, Corey SJ. The t(5;17) variant of acute promyelocytic leukemia expresses a nucleophosmin-retinoic acid receptor fusion. *Blood.* 1996; 87: 882-6.
9. Sano K, Takayama T, Murakami K, Saiki I, Makuuchi M. Overexpression of retinoic acid receptor alpha in hepatocellular carcinoma. *Clin Cancer Res.* 2003; 9: 3679-83.
10. Fox JG, Rogers AB, Whary MT, Ge Z, Ohtani M, Jones EK, Wang TC. Accelerated progression of gastritis to dysplasia in the pyloric antrum of TFF2 -/- C57BL6 x Sv129 Helicobacter pylori-infected mice. *Am J Pathol.* 2007; 171: 1520-8.
11. Sica A, Allavena P, Mantovani A. Cancer related inflammation: the macrophage connection. *Cancer Lett.* 2008; 267: 204-15.
12. Tahara T, Shibata T, Nakamura M, Yamashita H, Yoshioka D, Okubo M, Yonemura J, Maeda Y, Maruyama N, Kamano T, Kamiya Y, Fujita H, Nakagawa Y, et al. Effect of IL-1beta and TNF-alpha polymorphisms on the prognosis and survival of gastric cancer patients. *Clin Exp Med.* 2011; 11: 211-7.
13. Lee KH, Choi EY, Koh SA, Kim MK, Jang BI, Kim SW, Kim JR. IL-1beta-stimulated urokinase plasminogen activator expression through NF-kappaB in gastric cancer after HGF treatment. *Oncol Rep.* 2014; 31: 2123-30.
14. Chen Z, Han CK, Pan LL, Zhang HJ, Ma ZM, Huang ZF, Chen S, Zhuang XJ, Li ZB, Li XY, Li XJ, Yang SY. Serum

- alanine aminotransferase independently correlates with intrahepatic triglyceride contents in obese subjects. *Dig Dis Sci.* 2014; 59: 2470-6.
15. Huang H, Song Y, Wu Y, Guo N, Ma Y, Qian L. Erbin loss promotes cancer cell proliferation through feedback activation of Akt-Skp2-p27 signaling. *Biochem Biophys Res Commun.* 2015; 463: 370-6.
  16. Zhang C, Lan T, Hou J, Li J, Fang R, Yang Z, Zhang M, Liu J, Liu B. NOX4 promotes non-small cell lung cancer cell proliferation and metastasis through positive feedback regulation of PI3K/Akt signaling. *Oncotarget.* 2014; 5: 4392-405. doi: 10.18632/oncotarget.2025.
  17. Murakami D, Tsujitani S, Osaki T, Saito H, Katano K, Tatebe S, Ikeguchi M. Expression of phosphorylated Akt (pAkt) in gastric carcinoma predicts prognosis and efficacy of chemotherapy. *Gastric Cancer.* 2007; 10: 45-51.
  18. Kobayashi I, Semba S, Matsuda Y, Kuroda Y, Yokozaki H. Significance of Akt phosphorylation on tumor growth and vascular endothelial growth factor expression in human gastric carcinoma. *Pathobiology.* 2006; 73: 8-17.
  19. Matsuoka T, Yashiro M, Nishioka N, Hirakawa K, Olden K, Roberts JD. PI3K/Akt signalling is required for the attachment and spreading, and growth *in vivo* of metastatic scirrhous gastric carcinoma. *Br J Cancer.* 2012; 106: 1535-42.
  20. Day RM, Lee YH, Park AM, Suzuki YJ. Retinoic acid inhibits airway smooth muscle cell migration. *Am J Respir Cell Mol Biol.* 2006; 34: 695-703.
  21. Yang ZP, Zhao Y, Huang F, Chen J, Yao YH, Li J, Wu XN. Equol inhibits proliferation of human gastric carcinoma cells via modulating Akt pathway. *World J Gastroenterol.* 2015; 21: 10385-99.
  22. Doi A, Ishikawa K, Shibata N, Ito E, Fujimoto J, Yamamoto M, Shiga H, Mochizuki H, Kawamura Y, Goshima N, Semba K, Watanabe S. Enhanced expression of retinoic acid receptor alpha (RARA) induces epithelial-to-mesenchymal transition and disruption of mammary acinar structures. *Mol Oncol.* 2015; 9: 355-64.
  23. Ross-Innes CS, Stark R, Holmes KA, Schmidt D, Spyrou C, Russell R, Massie CE, Vowler SL, Eldridge M, Carroll JS. Cooperative interaction between retinoic acid receptor-alpha and estrogen receptor in breast cancer. *Genes Dev.* 2010; 24: 171-82.
  24. Ohashi E, Kogai T, Kagechika H, Brent GA. Activation of the PI3 kinase pathway by retinoic acid mediates sodium/iodide symporter induction and iodide transport in MCF-7 breast cancer cells. *Cancer Res.* 2009; 69: 3443-50.
  25. Masia S, Alvarez S, de Lera AR, Baretino D. Rapid, nongenomic actions of retinoic acid on phosphatidylinositol-3-kinase signaling pathway mediated by the retinoic acid receptor. *Mol Endocrinol.* 2007; 21: 2391-402.
  26. Vanhaesebroeck B, Leever SJ, Ahmadi K, Timms J, Katso R, Driscoll PC, Woscholski R, Parker PJ, Waterfield MD. Synthesis and function of 3-phosphorylated inositol lipids. *Annu Rev Biochem.* 2001; 70: 535-602.
  27. Yan TD, Wu H, Zhang HP, Lu N, Ye P, Yu FH, Zhou H, Li WG, Cao X, Lin YY, He JY, Gao WW, Zhao Y, et al. Oncogenic potential of retinoic acid receptor-gamma in hepatocellular carcinoma. *Cancer Res.* 2010; 70: 2285-95.
  28. Huang GL, Luo Q, Rui G, Zhang W, Zhang QY, Chen QX, Shen DY. Oncogenic activity of retinoic acid receptor gamma is exhibited through activation of the Akt/NF-kappaB and Wnt/beta-catenin pathways in cholangiocarcinoma. *Mol Cell Biol.* 2013; 33: 3416-25.
  29. Padro M, Mejias-Luque R, Cobler L, Garrido M, Perez-Garay M, Puig S, Peracaula R, de Bolos C. Regulation of glycosyltransferases and Lewis antigens expression by IL-1beta and IL-6 in human gastric cancer cells. *Glycoconj J.* 2011; 28: 99-110.
  30. Ibanez A, Rio P, Casado JA, Bueren JA, Fernandez-Luna JL, Pipaon C. Elevated levels of IL-1beta in Fanconi anaemia group A patients due to a constitutively active phosphoinositide 3-kinase-Akt pathway are capable of promoting tumour cell proliferation. *Biochem J.* 2009; 422: 161-70.
  31. Karin M. Nuclear factor-kappaB in cancer development and progression. *Nature.* 2006; 441: 431-6.
  32. Ren HY, Huang GL, Liu WM, Zhang W, Liu Y, Su GQ, Shen DY. IL-1beta induced RXRalpha overexpression through activation of NF-kappaB signaling in gastric carcinoma. *Biomed Pharmacother.* 2016; 78: 329-34.
  33. Shen DY, Zhan YH, Wang QM, Rui G, Zhang ZM. Oncogenic potential of cyclin kinase subunit-2 in cholangiocarcinoma. *Liver Int.* 2013; 33: 137-48.
